# Supplementary material
Source: MDPI journal article supplement (https://www.mdpi.com/2073-4344/14/3/211)
Supplement: s1 [file s1]

# Platinum on High-Entropy Aluminate Spinel as Thermally Stable CO Oxidation Catalysts

Christopher Riley <sup>1,\*</sup>, Andrew De La Riva <sup>2</sup>, Nichole Valdez <sup>1</sup>, Ryan Alcala <sup>2</sup>, Ping Lu <sup>1</sup>, Richard Grant <sup>1</sup>, Angelica Benavidez <sup>2</sup>, Mark Rodriguez <sup>1</sup>, Abhaya Datye <sup>2</sup> and Stanley S. Chou <sup>1</sup>

<sup>1</sup> Sandia National Laboratories, Albuquerque, NM 87185, USA

<sup>2</sup> Department of Chemical and Biological Engineering and Center for Microengineered Materials, University of New Mexico, Albuquerque, NM 87131, USA

\* Correspondence: criley@sandia.gov

## Supporting Information

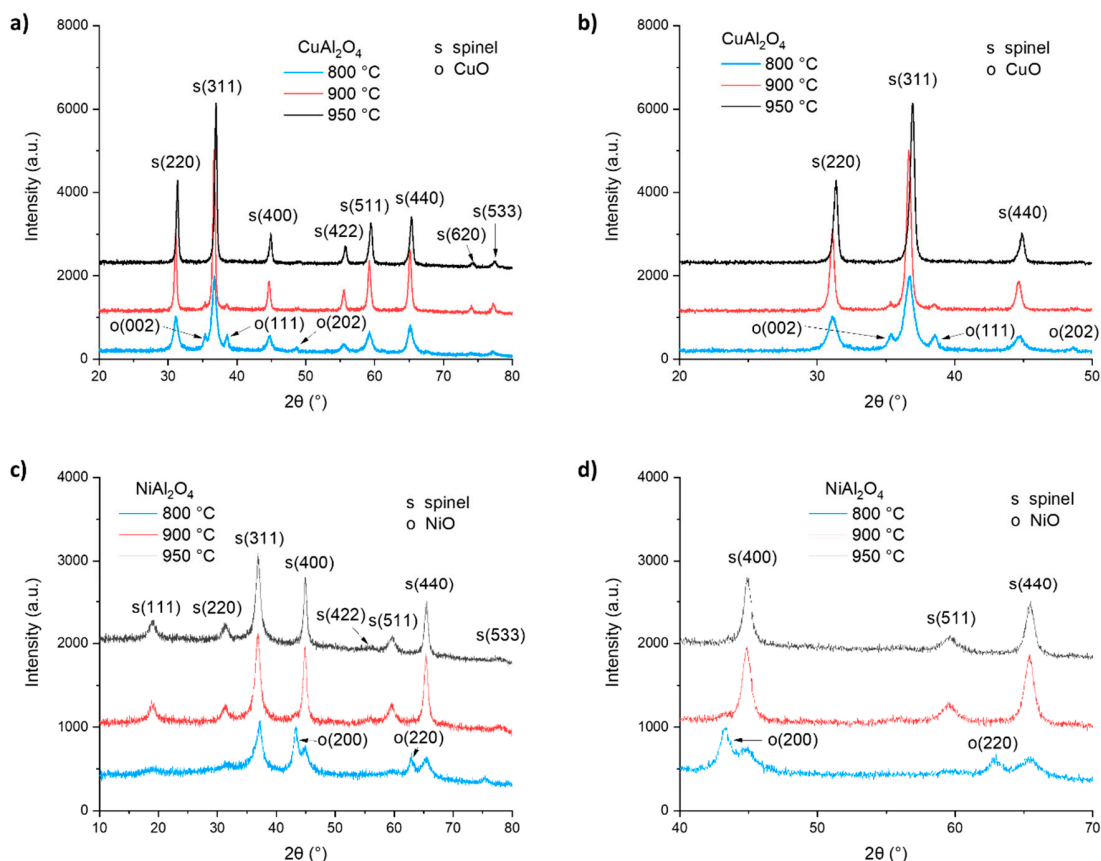

**Figure S1.** PXRD patterns of (a,b) CuAl<sub>2</sub>O<sub>4</sub> and (c,d) NiAl<sub>2</sub>O<sub>4</sub> spinel samples calcined at 800 °C and aged at 900 and 950 °C. Aged samples were quenched in ambient air.

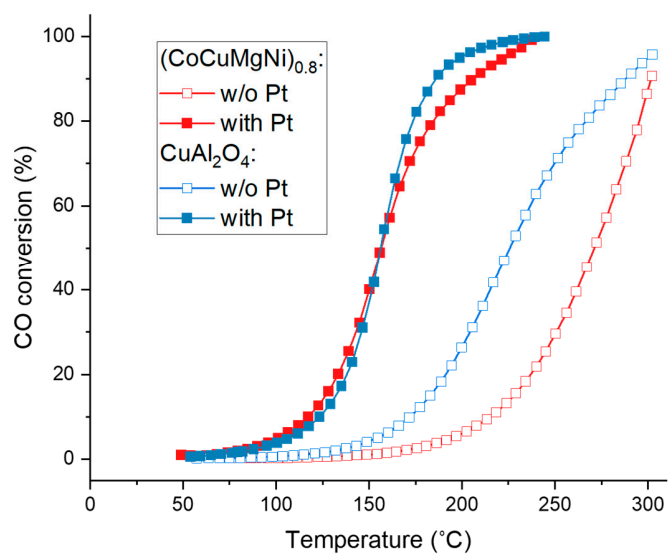

**Figure S2.** CO conversion over  $\text{CuAl}_2\text{O}_4$  and  $(\text{CoCuMgNi})_{0.8}$  with and without loaded platinum.

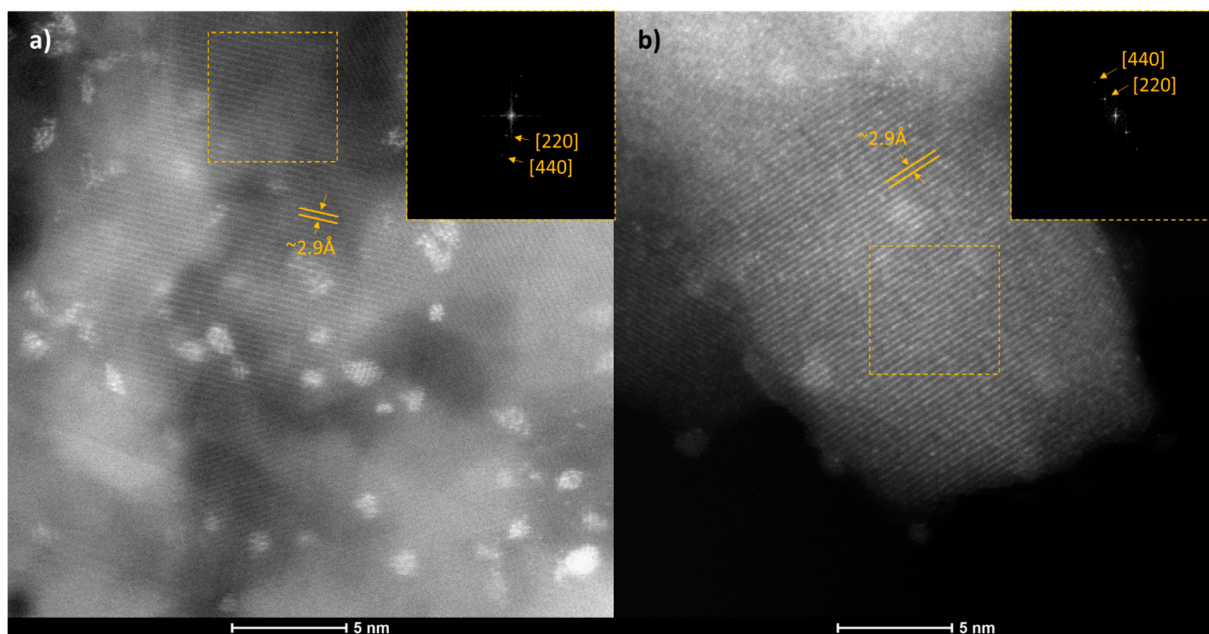

**Figure S3.** STEM images of (a) Pt – Mg after calcination and (b) Pt –  $(\text{CoCuMgNi})_1$  after aging.

**Table S1.** XRD and BET characterization of aged Pt-loaded samples

| Sample                         | Spinel lattice parameter (Å) | Spinel crystallite size (nm) | Spinel lattice strain (%) | Specific surface area (m <sup>2</sup> /g) |
|--------------------------------|------------------------------|------------------------------|---------------------------|-------------------------------------------|
| Pt – Co                        | 8.090                        | 18.3                         | 0.06                      | 75                                        |
| Pt – Cu                        | 8.083                        | 47.3                         | 0.035                     | 4                                         |
| Pt – Mg                        | 8.035                        | 19.5                         | 0.21                      | 107                                       |
| Pt – Ni                        | 8.044                        | 8.6                          | -0.31                     | 55                                        |
| Pt – (CoCuMgNi) <sub>1</sub>   | 8.071                        | 15.6                         | 0.06                      | 24                                        |
| Pt – (CoCuMgNi) <sub>0.8</sub> | 8.071                        | 13.8                         | 0.106                     | 35                                        |

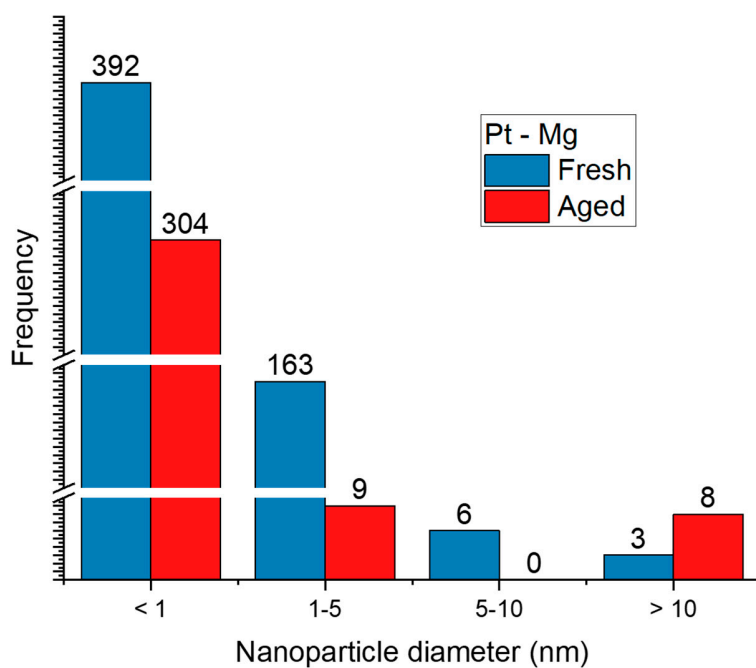

**Figure S4.** Estimated platinum particle size distribution measured from STEM imaging of Pt – Mg before and after aging.

**Table S2.** Compilation of previous PGM on HEO catalysts and performance in CO oxidation.

| HEO composition                                            | HEO synthesis method                                                  | Feed gas composition                           | Gas hourly space velocity (ml/g <sub>cat</sub> /h) | Approximate T <sub>100</sub> (°C) | Reference |
|------------------------------------------------------------|-----------------------------------------------------------------------|------------------------------------------------|----------------------------------------------------|-----------------------------------|-----------|
| Pt- (CoFeNiCuZn)-Al <sub>2</sub> O <sub>3</sub>            | Sol-gel synthesis with calcination at 900°C                           | 1% CO, 16% O <sub>2</sub> , 83% N <sub>2</sub> | 30,000                                             | 180                               | [1]       |
| Au- (MgNiZnCuCo)O                                          | Solid state mixing of binary metal oxides                             | 1% CO, 99% dry air                             | 30,000                                             | 230                               | [2]       |
| Ru- (BaSrBi)(ZrHfTiFe)O <sub>3</sub>                       | Ultrasonication of metal precursor and precipitation agent solution   | 1% CO, 99% dry air                             | 30,000                                             | 120                               | [3]       |
| Pd- (CeZrHfTiLaO <sub>x</sub> )-SiO <sub>2</sub>           | Ball milling of metal salt precursors, followed by 900 °C calcination | -                                              | 200,000                                            | 165                               | [4]       |
| Pt- (CoCuMgNi) <sub>1</sub> Al <sub>2</sub> O <sub>4</sub> | Sol-gel synthesis with calcination at 800°C                           | 1.9% CO, 1.3% O <sub>2</sub> , 96.8% He        | 232,500                                            | 222                               | This work |

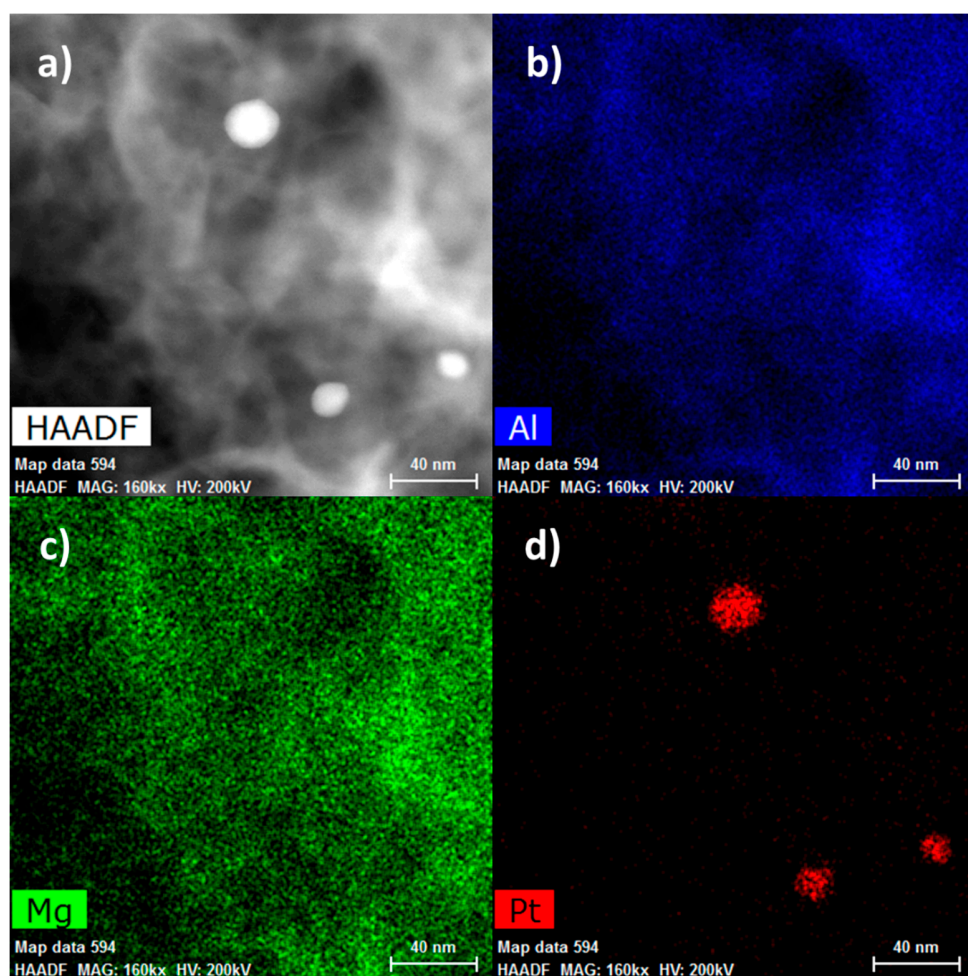

**Figure S5.** STEM imaging of 1wt% Pt-MgAl<sub>2</sub>O<sub>4</sub>-standard after aging at 800 °C for 8hrs via (a) HAADF mode and EDS imaging showing (b) aluminum, (c) magnesium, and (d) platinum within the sample.

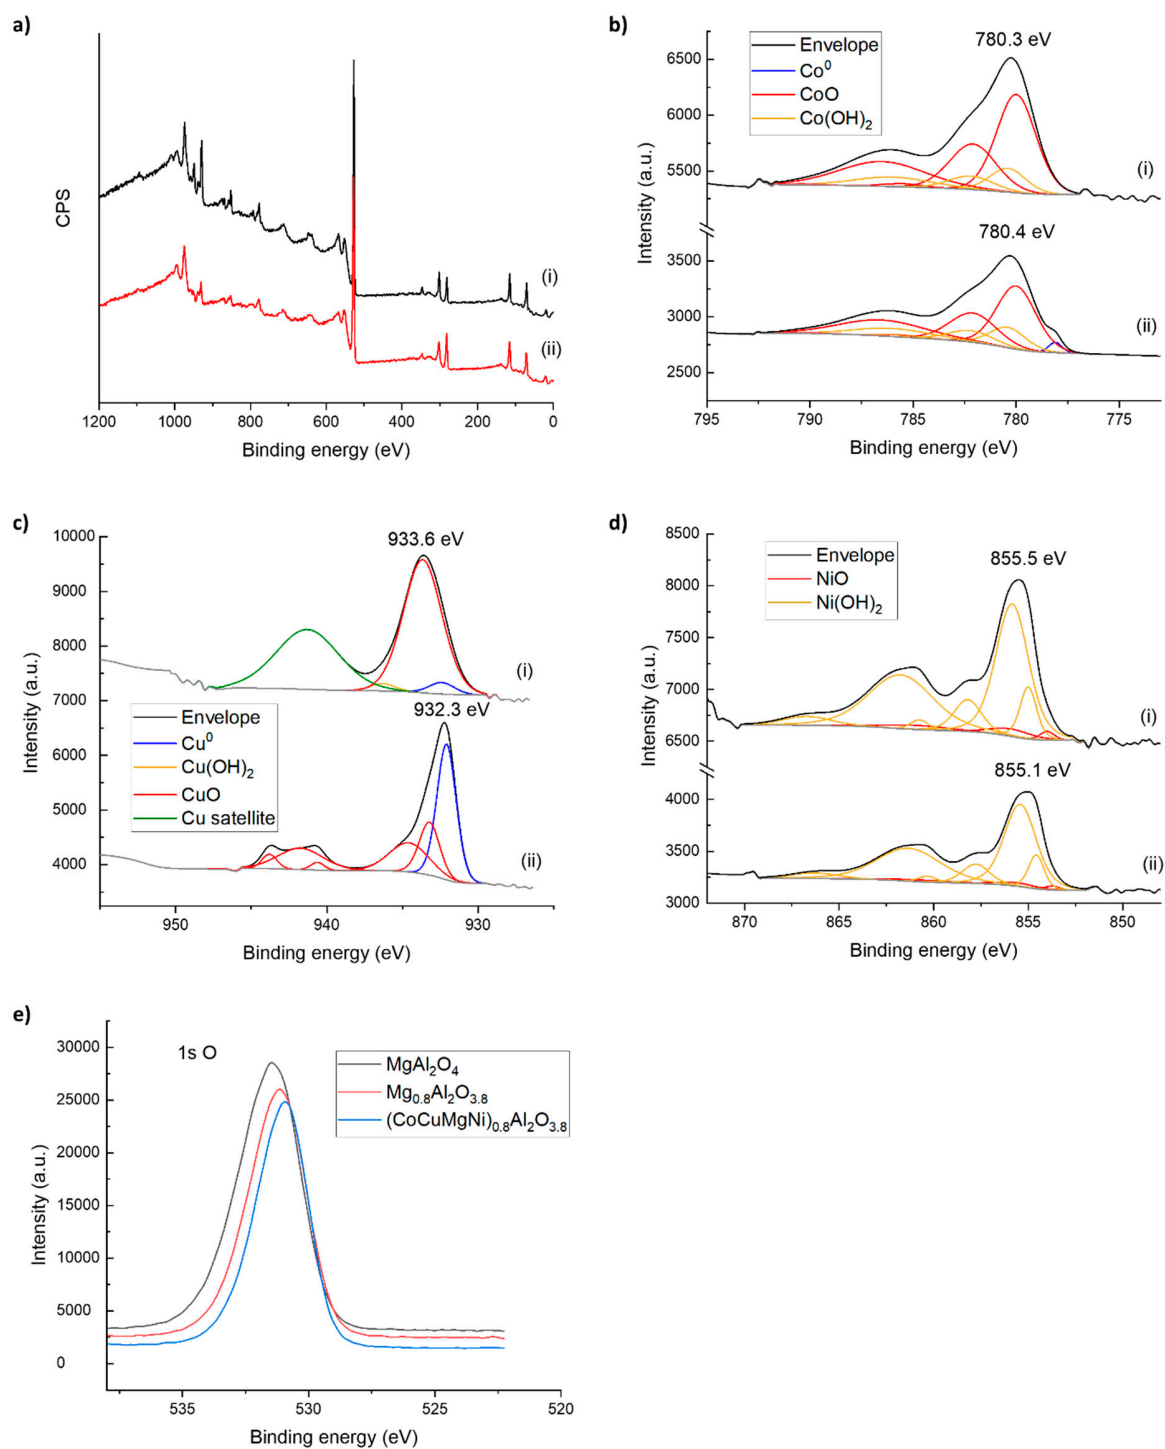

**Figure S6.** XPS (a) survey, (b) 2p Co, (c) 2p Cu, and (d) 2p Ni spectra of (i) the (CoCuMgNi)<sub>0.8</sub>Al<sub>2</sub>O<sub>3.8</sub> support as prepared and (ii) Pt – (CoCuMgNi) after aging, and (e) 1s O spectra of select spinel supports.[5, 6]

**Table S3.** Oxidation state of cobalt, copper, and nickel calculated from XPS spectra

| Sample                            | Relative oxidation state (%) |      |                 |                     |      |                 |                     |     |                 |
|-----------------------------------|------------------------------|------|-----------------|---------------------|------|-----------------|---------------------|-----|-----------------|
|                                   | Co(OH) <sub>2</sub>          | CoO  | Co <sup>0</sup> | Cu(OH) <sub>2</sub> | CuO  | Cu <sup>0</sup> | Ni(OH) <sub>2</sub> | NiO | Ni <sup>0</sup> |
| Aged Pt – (CoCuMgNi) <sub>1</sub> | 25.9                         | 71.8 | 2.3             | 0                   | 57.2 | 42.8            | 94.9                | 5.1 | 0               |

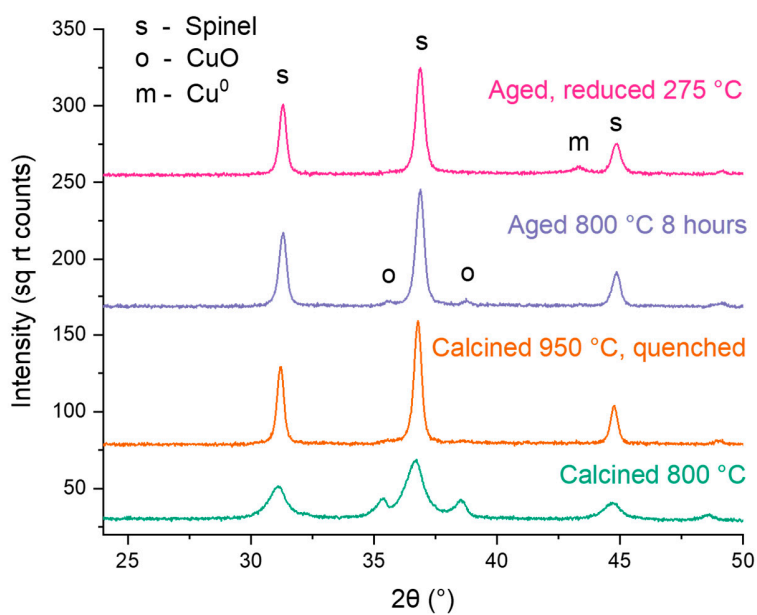

**Figure S7.** PXRD patterns of CuAl<sub>2</sub>O<sub>4</sub> after varying calcination, aging, and reduction heat treatments.

## References

- [1] S. Zhao, J. Lin, P. Wu, C. Ye, Y. Li, A. Li, X. Jin, Y. Zhao, G. Chen, Y. Qiu, D. Ye, A Hydrothermally Stable Single-Atom Catalyst of Pt Supported on High-Entropy Oxide/ $\text{Al}_2\text{O}_3$ : Structural Optimization and Enhanced Catalytic Activity, *ACS Appl. Mater. Interfaces*, 13 (2021) 48764-48773.
- [2] H. Chen, Y. Sun, S. Yang, H. Wang, W. Dmowski, T. Egami, S. Dai, Self-regenerative noble metal catalysts supported on high-entropy oxides, *Chem Commun*, 56 (2020) 15056-15059.
- [3] F. Okejiri, Z. Zhang, J. Liu, M. Liu, S. Yang, S. Dai, Room-Temperature Synthesis of High-Entropy Perovskite Oxide Nanoparticle Catalysts through Ultrasonication-Based Method, *ChemSusChem*, 13 (2020) 111-115.
- [4] H. Xu, Z. Zhang, J. Liu, C.L. Do-Thanh, H. Chen, S. Xu, Q. Lin, Y. Jiao, J. Wang, Y. Wang, Y. Chen, S. Dai, Entropy-stabilized single-atom Pd catalysts via high-entropy fluorite oxide supports, *Nat Commun*, 11 (2020) 3908.
- [5] A.P. Grosvenor, M.C. Biesinger, R.S.C. Smart, N.S. McIntyre, New interpretations of XPS spectra of nickel metal and oxides, *Surf. Sci.*, 600 (2006) 1771-1779.
- [6] M.C. Biesinger, B.P. Payne, L.W.M. Lau, A. Gerson, R.S.C. Smart, X-ray photoelectron spectroscopic chemical state quantification of mixed nickel metal, oxide and hydroxide systems, *Surf. Interface Anal.*, 41 (2009) 324-332.
